# Supplementary material
Source: PubMed Central journal article supplement (PMC4364242)
Supplement: pnas.201416900SI.pdf [file pnas.201416900SI.pdf]

# Supporting Information

Bowen et al. 10.1073/pnas.1416900112

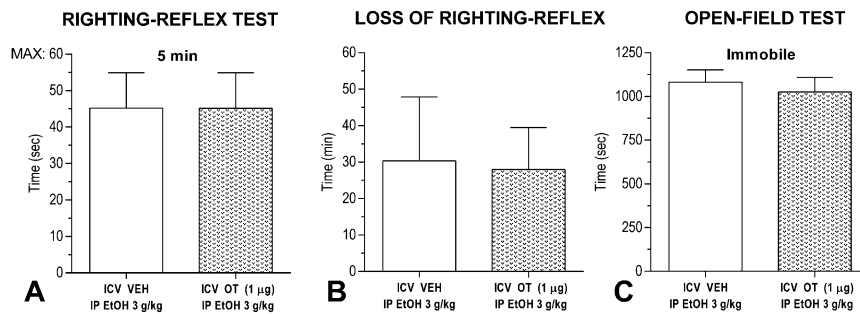

**Fig. S1.** Oxytocin (OT) does not prevent the severe motor impairment induced by a higher dose of ethanol (EtOH). Briefly, 16 male rats of the same strain, age, and weight used in the primary behavior experiments were randomly allocated to receive either i.c.v. VEH ( $n = 8$ ) or i.c.v. OT ( $1 \mu\text{g}$ ;  $n = 8$ ) + i.p. EtOH ( $3 \text{ mg/kg}$ ). (A) There was no significant difference between the VEH and OT conditions in time taken to right 5 min post-EtOH injection. (B) OT had no effect on the duration of the loss-of-righting reflex (LORR; the righting reflex was defined as being restored when the subject could right itself within 30 s). Note: all rats except four (two VEH, two OT) had a complete loss of the righting reflex. (C) OT had no impact on the time spent immobile in the 20-min open-field test conducted from 10–30 min post-EtOH administration.

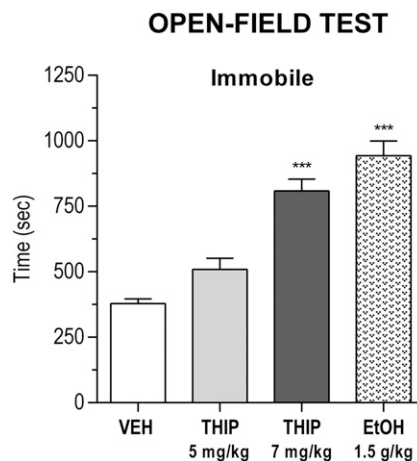

**Fig. S2.** The  $7 \text{ mg/kg}$  4,5,6,7-tetrahydroisoxazolo(5,4-c)pyridin-3-ol (THIP) produces a similar level of immobility to  $1.5 \text{ g/kg}$  ethanol (EtOH) in the open-field test. Briefly, 20 male rats of the same strain, age, and weight as used in the primary behavioral experiments were randomly allocated to receive i.p. VEH, THIP ( $5$  or  $7 \text{ mg/kg}$ ), or EtOH ( $1.5 \text{ g/kg}$ ) and were tested in the 20-min open-field test (as described in *Methods*) 10 min after drug administration. Time spent immobile was assessed, and the  $7 \text{ mg/kg}$  dose of THIP was chosen for use in the THIP–oxytocin experiment (Fig. 4) because it produced a similar sedative effect to  $1.5 \text{ g/kg}$  EtOH. \*\*\* $P < 0.001$  vs. VEH; THIP  $7 \text{ mg/kg}$  vs. EtOH  $1.5 \text{ g/kg}$ ,  $P > 0.05$ .

**Table S1.** Statistics from the contrast analysis of the OT–EtOH behavioral experiment

| Test                 | Contrast (i.c.v. + i.p. vs. i.c.v. + i.p.) |                   |                        |       |                         |              |                          |              |
|----------------------|--------------------------------------------|-------------------|------------------------|-------|-------------------------|--------------|--------------------------|--------------|
|                      | VEH + VEH vs. VEH + EtOH                   |                   | VEH + VEH vs. OT + VEH |       | VEH + VEH vs. OT + EtOH |              | VEH + EtOH vs. OT + EtOH |              |
|                      | $F_{1,24}$                                 | $P$               | $F_{1,24}$             | $P$   | $F_{1,24}$              | $P$          | $F_{1,24}$               | $P$          |
| Wire-hanging 1       | 10.98                                      | <b>0.003</b>      | 0.95                   | 0.339 | 1.51                    | 0.232        | 4.35                     | <b>0.048</b> |
| Righting-reflex 1    | 16.57                                      | <b>&lt; 0.001</b> | 0.12                   | 0.728 | 1.77                    | 0.196        | 7.51                     | <b>0.011</b> |
| Open-field: immobile | 16.34                                      | <b>&lt; 0.001</b> | 0.74                   | 0.398 | 2.92                    | 0.1          | 5.44                     | <b>0.028</b> |
| Wire-hanging 2       | 21.11                                      | <b>&lt; 0.001</b> | 3.87                   | 0.061 | 5.88                    | <b>0.023</b> | 4.71                     | <b>0.04</b>  |
| Righting-reflex 2    | 24.71                                      | <b>&lt; 0.001</b> | 0.15                   | 0.699 | 7.155                   | <b>0.013</b> | 5.27                     | <b>0.031</b> |

$P$  values for significant differences are highlighted in bold.

**Table S2. Statistics from one-sample *t* tests examining change from response either to 30 nM GABA (nos. 1 and 2), 3 nM GABA (nos. 3–6), or 100 nM THIP (no. 7) applied alone or to baseline current (nos. 8 and 9)**

| No. | Concentration of compound(s) applied    | Cell                    |          |                   |                         |          |              |                   |          |          |                   |          |          |
|-----|-----------------------------------------|-------------------------|----------|-------------------|-------------------------|----------|--------------|-------------------|----------|----------|-------------------|----------|----------|
|     |                                         | $\alpha 4\beta 1\delta$ |          |                   | $\alpha 4\beta 3\delta$ |          |              | $\alpha 4\beta 1$ |          |          | $\alpha 4\beta 3$ |          |          |
|     |                                         | df                      | <i>t</i> | <i>P</i>          | df                      | <i>t</i> | <i>P</i>     | df                | <i>t</i> | <i>P</i> | df                | <i>t</i> | <i>P</i> |
| 1   | 30 nM GABA + 30 mM EtOH                 | 2                       | 13.45    | <b>0.005</b>      | 2                       | 8.72     | <b>0.013</b> | —                 | —        | —        | —                 | —        | —        |
| 2   | 30 nM GABA + 30 mM EtOH + 10 $\mu$ M OT | 2                       | 1.5      | 0.272             | 2                       | 0.39     | 0.731        | —                 | —        | —        | —                 | —        | —        |
| 3   | 3 nM GABA + 30 mM EtOH                  | 8                       | 12.35    | <b>&lt; 0.001</b> | —                       | —        | —            | 4                 | 0.61     | 0.572    | 2                 | 0.21     | 0.856    |
| 4   | 3 nM GABA + 30 mM EtOH + 10 $\mu$ M OT  | 4                       | 2.12     | 0.11              | —                       | —        | —            | —                 | —        | —        | —                 | —        | —        |
| 5   | 3 nM GABA + 30 mM EtOH + 10 $\mu$ M AVP | 3                       | 4.05     | <b>0.027</b>      | —                       | —        | —            | —                 | —        | —        | —                 | —        | —        |
| 6   | 3 nM GABA + 10 $\mu$ M OT               | 2                       | 0.46     | 0.688             | —                       | —        | —            | —                 | —        | —        | —                 | —        | —        |
| 7   | 100 nM THIP + 10 $\mu$ M OT             | 2                       | 3.08     | 0.091             | —                       | —        | —            | —                 | —        | —        | —                 | —        | —        |
| 8   | 30 mM EtOH                              | 2                       | 0.02     | 0.984             | —                       | —        | —            | —                 | —        | —        | —                 | —        | —        |
| 9   | 10 $\mu$ M OT                           | 2                       | 1.81     | 0.211             | —                       | —        | —            | —                 | —        | —        | —                 | —        | —        |

*P* values for significant changes are highlighted in bold. — indicates that the cell was not tested with the concentration and combination of compounds listed in that row.

**Table S3. Statistics for comparison of response to GABA + EtOH vs. GABA + EtOH + OT/AVP**

| Comparison                                                          | Cell                    |          |                   |                         |          |              |
|---------------------------------------------------------------------|-------------------------|----------|-------------------|-------------------------|----------|--------------|
|                                                                     | $\alpha 4\beta 1\delta$ |          |                   | $\alpha 4\beta 3\delta$ |          |              |
|                                                                     | df                      | <i>t</i> | <i>P</i>          | df                      | <i>t</i> | <i>P</i>     |
| 3 nM GABA + 30 mM EtOH vs. 3 nM GABA + 30 mM EtOH + 10 $\mu$ M OT   | 4                       | 10.91    | <b>&lt; 0.001</b> | —                       | —        | —            |
| 3 nM GABA + 30 mM EtOH vs. 3 nM GABA + 30 mM EtOH + 10 $\mu$ M AVP  | 3                       | 0.82     | 0.475             | —                       | —        | —            |
| 30 nM GABA + 30 mM EtOH vs. 30 nM GABA + 30 mM EtOH + 10 $\mu$ M OT | 2                       | 23.47    | <b>0.002</b>      | 2                       | 8.18     | <b>0.015</b> |

*P* values for significant differences are highlighted in bold. — indicates that the cell was not tested with the concentration and combination of compounds listed in that row.

**Table S4. Statistics from the contrast analysis of the OT–THIP behavioral experiment**

| Test                 | Contrast (i.c.v. + i.p. vs. i.c.v. + i.p.) |              |                        |          |                         |              |                          |          |
|----------------------|--------------------------------------------|--------------|------------------------|----------|-------------------------|--------------|--------------------------|----------|
|                      | VEH + VEH vs. VEH + THIP                   |              | VEH + VEH vs. OT + VEH |          | VEH + VEH vs. OT + THIP |              | VEH + THIP vs. OT + THIP |          |
|                      | $F_{1,27}$                                 | <i>P</i>     | $F_{1,27}$             | <i>P</i> | $F_{1,27}$              | <i>P</i>     | $F_{1,27}$               | <i>P</i> |
| Open-field: immobile | 4.48                                       | <b>0.044</b> | 0.56                   | 0.46     | 7.46                    | <b>0.011</b> | 0.43                     | 0.518    |

*P* values for significant differences are highlighted in bold.

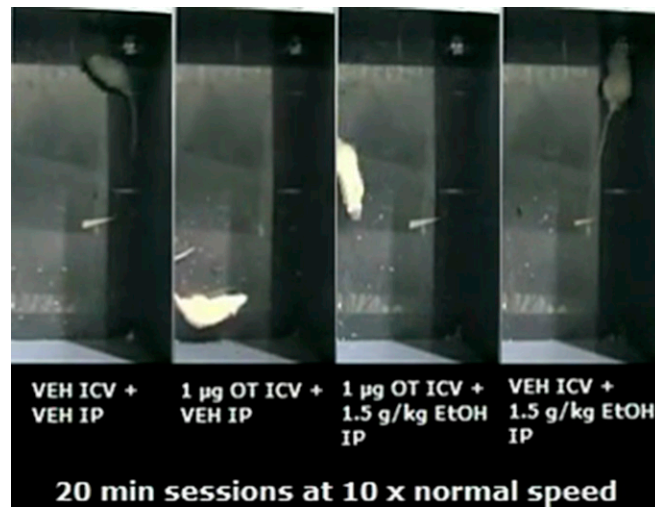

**Movie S1.** The “sobering-up” effect of oxytocin (OT) in ethanol (EtOH)-treated rats. This movie shows rats tested in the open-field locomotor activity test conducted 10–30 min after i.p. injection of EtOH (1.5 g/kg) or vehicle (VEH), preceded by i.c.v. OT or VEH pretreatment. Movies are presented at 10× normal speed. The rat on the far left received i.c.v. VEH + i.p. VEH; in the middle left received i.c.v. OT (1 μg) + i.p. VEH; in the middle right received i.c.v. OT (1 μg) + i.p. EtOH (1.5 g/kg); and on the far right received i.c.v. VEH + i.p. EtOH (1.5 g/kg).

[Movie S1](#)
